# Supplementary material for: Effect of High Hydrostatic Pressure and Thermal Processing on the Shelf Life and Quality Attributes of Apple-Kiwi-Carrot Puree Blend
Source: Hindawi journal article supplement (doi:10.1155/2023/1631285), 2023-06-17
Supplement: f1 [file 1631285.f1.pdf]

Table S1 The sensory evaluation of the puree blends of different compositions

| Apple:kiwi:carrot<br>(w:w) | Taste                   | Color                  | Gloss                   | Texture                 | Flavou                  | Total score              |
|----------------------------|-------------------------|------------------------|-------------------------|-------------------------|-------------------------|--------------------------|
| 3: 2: 1                    | 27.10±8.32 <sup>a</sup> | 7.80±1.48 <sup>a</sup> | 7.40±1.51 <sup>a</sup>  | 15.50±2.76 <sup>a</sup> | 15.70±3.43 <sup>a</sup> | 73.50±11.43 <sup>a</sup> |
| 4: 2: 1                    | 24.40±8.38 <sup>a</sup> | 6.90±2.02 <sup>a</sup> | 7.20±1.69 <sup>ab</sup> | 14.10±2.81 <sup>a</sup> | 14.90±4.07 <sup>a</sup> | 67.50±14.57 <sup>a</sup> |
| 5: 2: 1                    | 28.70±7.21 <sup>a</sup> | 8.30±1.49 <sup>a</sup> | 7.90±1.20 <sup>a</sup>  | 14.60±2.63 <sup>a</sup> | 15.90±2.33 <sup>a</sup> | 75.40±9.64 <sup>a</sup>  |
| 6: 2: 1                    | 30.50±7.96 <sup>a</sup> | 8.20±0.92 <sup>a</sup> | 8.10±1.29 <sup>a</sup>  | 15.10±3.51 <sup>a</sup> | 16.90±2.23 <sup>a</sup> | 78.80±11.95 <sup>a</sup> |
| 5: 3: 1                    | 30.90±6.84 <sup>a</sup> | 7.20±0.92 <sup>a</sup> | 6.80±1.55 <sup>ab</sup> | 15.00±2.71 <sup>a</sup> | 17.40±1.65 <sup>a</sup> | 77.30±68.56 <sup>a</sup> |
| 6: 3: 1                    | 29.80±8.48 <sup>a</sup> | 5.40±1.90 <sup>b</sup> | 5.70±2.21 <sup>b</sup>  | 14.60±3.56 <sup>a</sup> | 15.80±2.49 <sup>a</sup> | 71.30±13.25 <sup>a</sup> |

Values with different lowercase letters within one column were significantly different

( $p < 0.05$ )

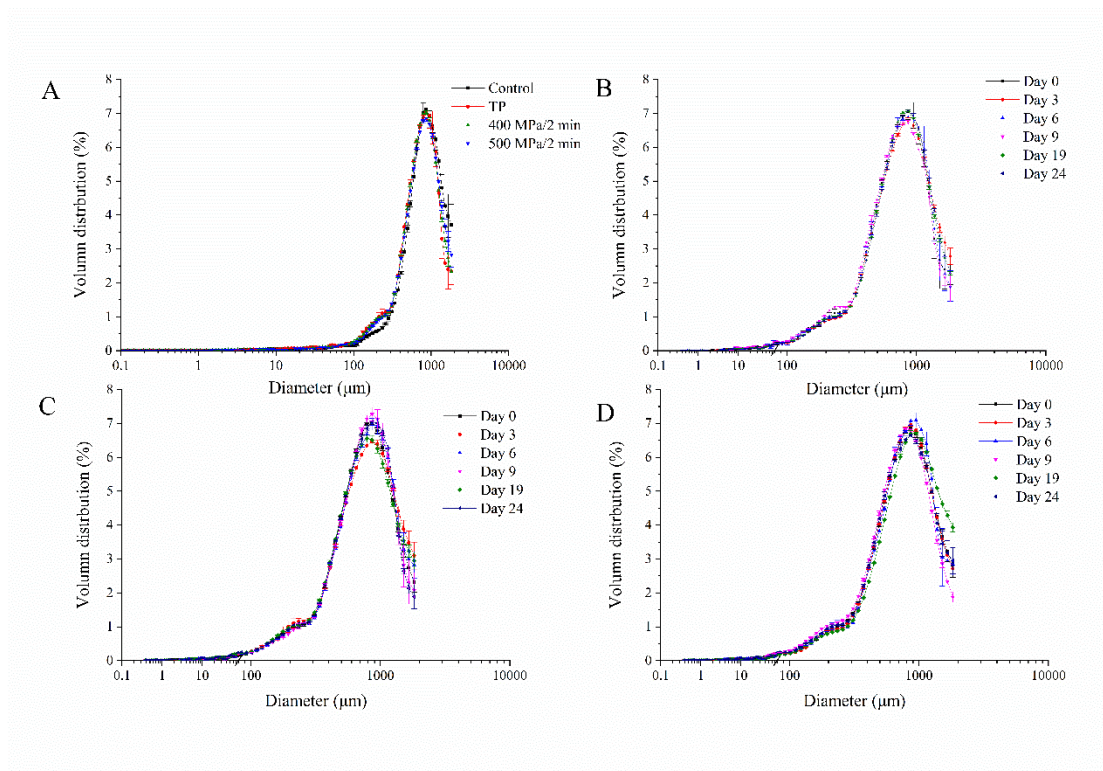

Figure S1 The particle size distribution (PSD) of pure blends after processing and storage (A: samples at day 0; B: 90°C/2 min; C: 400 MPa/2 min; D: 500 MPa/2 min)
